# Supplementary material for: Intercalation of cationic phthalocyanines into layered titanates and control of the microstructuresElectronic supplementary information (ESI) available: CHN analytical data and amounts of PA and Pc intercalated in Ti3O7 (Table S1), and XRD patterns of products derived from H2Ti3O7 (Fig. S1). See http://www.rsc.org/suppdata/jm/b2/b210237b/
Source: Royal Society of Chemistry journal article supplement (doi:10.1039/b210237b), 2002-11-06

**Table S1** Amounts of propylammonium cations and phthalocyanines Pc intercalated into the interlayer space of Ti3O7

|  | C/wt% | N/wt% | amount of Pc mol/1 mol host | amount of PA  mol/1 mol host |
| --- | --- | --- | --- | --- |
| H2Ti3O7 | — | — | — | — |
| PA/Ti3O7 | 6.55 | 2.43 | — | 0.544 |
| ABpy/Ti3O7 (pH=10.3) | 19.36 | 5.09 | 0.093 | 0.178 |
| FePc/Ti3O7 | 15.01 | 5.25 | 0.118 | 0.280 |

**Fig. S1** XRD patterns of (a) H2Ti3O7, (b) PA/Ti3O7, (c) PA/Ti3O7 + ABpy(OH)4,and (d) PA/Ti3O7 + FePc(Cl).


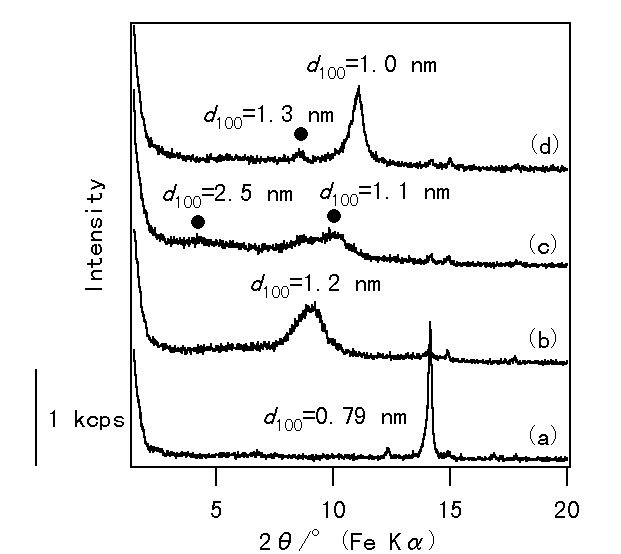

Supplement: b210237b.doc [file b210237b.doc]
